# Supplementary material for: GATA3 protein as a MUC1 transcriptional regulator in breast cancer cells
Source: Springer Nature journal article supplement (doi:10.1186/bcr1617), 2006-11-01
Supplement: Additional file 2 [file bcr1617-s2.pdf]

**Supplementary File 2: Principal Component Analysis of TMA data.**

**Correlation Matrix**

|                 |             | MUC1        | GATA3        | ER status    | PR status    | Histology | Tumor grade | Lymph node |
|-----------------|-------------|-------------|--------------|--------------|--------------|-----------|-------------|------------|
| Kendall's tau-b | MUC1        |             |              |              |              |           |             |            |
|                 | GATA3       | <b>.440</b> |              |              |              |           |             |            |
|                 | ER status   | -.025       | <b>.530</b>  |              |              |           |             |            |
|                 | PR status   | .037        | <b>.506</b>  | <b>.700</b>  |              |           |             |            |
|                 | Histology   | -.073       | -.009        | -.095        | -.004        |           |             |            |
|                 | Tumor grade | -.041       | <b>-.490</b> | <b>-.668</b> | <b>-.528</b> | .108      |             |            |
|                 | Lymph node  | <b>.462</b> | .099         | .063         | -.031        | .139      | .061        |            |
| p value         | MUC1        |             |              |              |              |           |             |            |
|                 | GATA3       | <b>.011</b> |              |              |              |           |             |            |
|                 | ER status   | .385        | <b>.000</b>  |              |              |           |             |            |
|                 | PR status   | .334        | <b>.001</b>  | <b>.000</b>  |              |           |             |            |
|                 | Histology   | .197        | .456         | .133         | .480         |           |             |            |
|                 | Tumor grade | .318        | <b>.002</b>  | <b>.000</b>  | <b>.000</b>  | .103      |             |            |
|                 | Lymph node  | <b>.006</b> | .124         | .229         | .357         | .052      | .238        |            |

Color code:

Statistical significant positive correlations

Statistical significant negative correlations

**Total Variance Explained**

| Component | Initial Eigenvalues |               |              | Extraction Sums of Squared Loadings |               |              | Rotation Sums of Squared Loadings |               |              |
|-----------|---------------------|---------------|--------------|-------------------------------------|---------------|--------------|-----------------------------------|---------------|--------------|
|           | Total               | % of Variance | Cumulative % | Total                               | % of Variance | Cumulative % | Total                             | % of Variance | Cumulative % |
| 1         | 2.042               | 29.165        | 29.165       | 2.042                               | 29.165        | 29.165       | 2.005                             | 28.643        | 28.643       |
| 2         | 1.293               | 18.476        | 47.641       | 1.293                               | 18.476        | 47.641       | 1.291                             | 18.441        | 47.084       |
| 3         | 1.064               | 15.195        | 62.835       | 1.064                               | 15.195        | 62.835       | 1.103                             | 15.752        | 62.835       |
| 4         | .790                | 11.284        | 74.119       |                                     |               |              |                                   |               |              |
| 5         | .708                | 10.110        | 84.230       |                                     |               |              |                                   |               |              |
| 6         | .683                | 9.756         | 93.986       |                                     |               |              |                                   |               |              |
| 7         | .421                | 6.014         | 100.000      |                                     |               |              |                                   |               |              |

Supplementary figure. GATA3 and MUC1 immunohistochemical staining in normal breast samples.

- a) Linear regression analysis between both markers with 95% mean prediction interval ( $r=0.78$ ,  $p=0.001$ );
- b) GATA3 nuclear positive immunostaining; c) MUC1 apical cytoplasmic immunostaining.
